# Supplementary material
Source: MDPI journal article supplement (https://www.mdpi.com/2673-9984/2/1/19)
Supplement: s1 [file s1]

# Full Title Of Presentation

Author Name

[authoremail@stanford.edu](mailto:authoremail@stanford.edu)

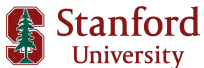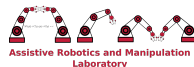

Department of Mechanical Engineering  
Stanford University

June 16, 2020

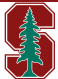

Introduction

Examples

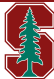

## Itemize example

- ▶ Item 1
- ▶ Item 2

**Table 1:** Example of Table - Taxonomy of human intent prediction

| Human                 |                     | Execution Strategy<br>(Action)                                                                                                                      |                                                                                               |
|-----------------------|---------------------|-----------------------------------------------------------------------------------------------------------------------------------------------------|-----------------------------------------------------------------------------------------------|
|                       |                     | Observer<br>Knows                                                                                                                                   | Observer<br>Unknown                                                                           |
| Objective<br>Function | Observer<br>Knows   | All is Known (e.g. Ping Pong)<br>where both objective and actions are clear                                                                         | Human Action Model is unclear<br>or suboptimal (e.g. chess)                                   |
|                       | Observer<br>Unknown | Human action model is well known,<br>but objective is not (e.g. joy-riding in car<br>or free running, where destination<br>or direction is unclear) | Poor action model and objective<br>function (e.g. Poor / good cook,<br>no idea of final dish) |

- ▶ Tables can be referenced as Table 1



Example of a figure, shown in Figure 2.

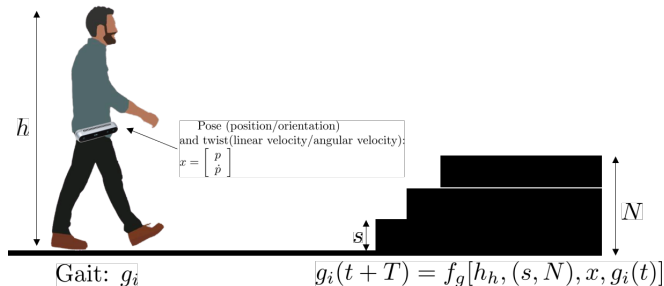

Figure 2: Example Figure

# Example of Horizontal Subfigures

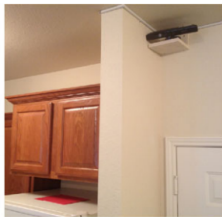

(a) Single Kinect setup for fall prevention in elderly residence [1]

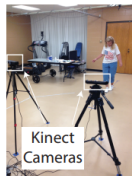

(b) Multiple Kinects calibration for fall prediction[2]

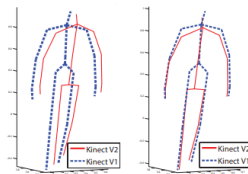

Figure 3: Examples of Horizontal Subfigures

Example of Horizontal Alignment of a table and a figure.

Table 2: Environment limitations on data collection

|                         | Kinect | Stereo | Kinect + Stereo |
|-------------------------|--------|--------|-----------------|
| Indoor                  | ✓      | ✓      | ✓               |
| Outdoor                 | ✗      | ✓      | ✓               |
| High number of features | ✓      | ✓      | ✓               |
| Low number of features  | ✓      | ✗      | ✓               |

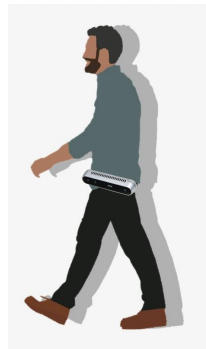

# Example of resizable equations

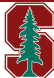

min

$$J = \int (a_{real} - \hat{a})^2$$

subject to

human kinematics

no collision

no falling



$${}^A R_B(t_0) = \begin{bmatrix} 1 & 0 & 0 \\ 0 & 1 & 0 \\ 0 & 0 & 0 \end{bmatrix} + \sin(\theta) \begin{bmatrix} 0 & -v_3 & v_2 \\ v_3 & 0 & -y_1 \\ -v_2 & v_1 & 0 \end{bmatrix} + (1 - \cos(\theta)) \begin{bmatrix} 0 & -v_3 & v_2 \\ v_3 & 0 & -v_1 \\ -v_2 & v_1 & 0 \end{bmatrix}^2 \quad (1)$$

$${}^A R_B(t) = \Delta R {}^A R_B(t_0) \quad (2)$$

$$\Delta R = {}^A R_B(t) {}^A R_B^T(t_0) \quad (3)$$





Click!



- [1] E. E. Stone and M. Skubic, “Fall detection in homes of older adults using the Microsoft Kinect,” *IEEE journal of biomedical and health informatics*, vol. 19, no. 1, pp. 290–301, 2014. DOI: [10.1109/JBHI.2014.2312180](https://doi.org/10.1109/JBHI.2014.2312180). [Online]. Available: <https://ieeexplore.ieee.org/abstract/document/6774430>.
- [2] A. N. Staranowicz, C. Ray, and G.-L. Mariottini, “Easy-to-use, general, and accurate multi-Kinect calibration and its application to gait monitoring for fall prediction,” in *2015 37th Annual International Conference of the IEEE Engineering in Medicine and Biology Society (EMBC)*, IEEE, 2015, pp. 4994–4998. DOI: [10.1109/EMBC.2015.7319513](https://doi.org/10.1109/EMBC.2015.7319513). [Online]. Available: <https://ieeexplore.ieee.org/abstract/document/7319513/>.
